1 Asymmetry in kinematic generalization between visual and passive  
2 lead-in movements are consistent with a forward model in the  
3 sensorimotor system

4

5 Abbreviated title: Spatiotemporal generalization of lead-in movements

6

7 Ian S. Howard<sup>1</sup>, Sae Franklin<sup>2</sup> and David W. Franklin<sup>3</sup>

8

9 <sup>1</sup>Centre for Robotics and Neural Systems, School of Computing, Electronics  
10 and Mathematics, University of Plymouth, Plymouth, United Kingdom

11 <sup>2</sup>Institute for Cognitive Systems, Department of Electrical and Computer  
12 Engineering, Technical University of Munich, Germany

13 <sup>3</sup>Neuromuscular Diagnostics, Department of Sport and Health Sciences,  
14 Technical University of Munich, Germany

15

16 Correspondence should be sent to:

17 Ian S. Howard,

18 Centre for Robotics and Neural Systems, School of Computing, Electronics  
19 and Mathematics, University of Plymouth, Plymouth, United Kingdom

20

21 Email: [ian.howard@plymouth.ac.uk](mailto:ian.howard@plymouth.ac.uk)

22 Telephone: 0044 1752 586324

23

24 Keywords: motor learning, context, transfer, dynamic learning, motor  
25 memories, human

26

27 **Number of pages: 18**

28 **Number of figures: 6**

29 **Number of tables: 1**

30 **Number of words for Abstract: 248**

31 **Number of words for Introduction: 641**

32 **Number of words for Discussion: 1497**

33

### 34 **Conflict of Interest**

35 The authors declare that they have no financial, personal, or professional interests  
36 that could be construed to have influenced the paper.

37

### 38 **Acknowledgements**

39 Financial support was provided by the Centre for Robotics and Neural Systems at  
40 Plymouth University and by the Bavarian State Ministry for Science, Research & the  
41 Arts

42

## 43 **Abstract**

44

45 In our daily life we often make complex actions comprised of linked  
46 movements, such as reaching for a cup of coffee and bringing it to our mouth  
47 to drink. Recent work has highlighted the role of such linked movements in the  
48 formation of independent motor memories, affecting the learning rate and  
49 ability to learn opposing force fields. However, while such work has described  
50 the angular generalization function representing the neural tuning of motor  
51 memory formation in state space, we have no understanding of how different  
52 movement kinematics (such as distance, speed or duration) affects the  
53 formation of these independent motor memories. Here we investigate such  
54 kinematic generalization for both passive and visual lead-in movements to  
55 probe their individual characteristics. After participants adapted to opposing  
56 force fields using training lead-in movements, the lead-in kinematics were  
57 modified on random trials to test generalization. For both visual and passive  
58 modalities, predictive compensation was sensitive to lead-in duration and  
59 peak speed, falling off away from the training condition. However, little decay  
60 was found with increasing lead-in distance. Interestingly, asymmetric transfer  
61 between lead-in movement modalities was also observed, with partial transfer  
62 from passive to visual, but very little vice versa. Overall these tuning effects  
63 were stronger for passive compared to visual lead-ins demonstrating the  
64 difference in these sensory inputs in regulating motor memories. Our results  
65 suggest these effects are a consequence of state estimation, with differences  
66 across modalities reflecting their different levels of sensory uncertainty arising  
67 as a consequence of dissimilar feedback delays.

68

69

## 70 **Significance Statement**

71

72 Using a force field interference paradigm, we show that the generalization of  
73 motor memory is strongly tuned to variations in lead-in kinematics, with  
74 passive lead-ins exhibiting a stronger influence and sharper tuning than visual  
75 lead-ins. This asymmetry is mirrored in the transfer of adaptation between  
76 modalities, with stronger transfer from the passive to visual condition. We  
77 suggest these differences arise due to state estimation during the lead-in, with  
78 larger delays in visual signals increasing their uncertainty. This reduces their  
79 feedback weighting compared to proprioceptive signals, producing a smaller  
80 estimated state change, and therefore smaller decay in predictive force.  
81 Overall these results provide further evidence that the human motor system  
82 uses observer-based control, based on a forward model to estimate state.

83

84

## 85 **Introduction**

86

87 Recent studies have highlighted key aspects for neural rehabilitation using  
88 robotic systems (Reinkensmeyer et al., 2016). However, continual progress in  
89 this area depends on understanding the mechanisms of human sensorimotor  
90 learning in order to determine the optimal presentation of sensory information  
91 to improve the rate, retention and generalization of adaptation. Although  
92 adaptation is often studied on single movements in the laboratory, we rarely

93 produce movements in isolation in everyday life. Rather, one movement often  
94 directly leads into another. For example, to catch a ball, we make use of  
95 visual motion information to estimate its state in order to plan and execute an  
96 interception movement. Thus, natural movements often follow directly from  
97 previous movements or from visual motion.

98  
99 Recent work has shown that closely linking multiple movements together in  
100 time reduces interference in learning opposing tasks (Howard et al., 2012;  
101 2015; Sheahan et al., 2016; Howard et al., 2017). In particular, distinct past  
102 movements act like a contextual cue, enabling adaptation to opposing viscous  
103 curl fields when these movements are preceded by unique lead-in motions,  
104 each associated with one of the dynamics (Howard et al., 2012). This shows  
105 that motor learning and recall depends not only on the current state of the arm  
106 during a movement, but also on its preceding states. Interestingly, active,  
107 passive or visual lead-in movements were all equally effective at reducing  
108 interference. This indicates that sensory feedback relating to motion is  
109 sufficient to affect adaptation, even when no active movement is involved. The  
110 contextual effect of this prior movement disappears as the time between lead-  
111 in and adaptation movements exceeds about half a second, indicating that the  
112 representation of past state decays quickly over time. This suggests a strong  
113 link between the representation of state and the theory of neural population  
114 dynamics (Churchland et al., 2012; Pandarinath et al., 2015).

115  
116 Dynamic adaptation to a single force field occurs locally; after training in a  
117 specific movement, the recall of predictive compensation decays as the  
118 movement angle (Thoroughman and Shadmehr, 2000; Donchin et al., 2003;  
119 Howard and Franklin, 2015; 2016) or distance (Gandolfo et al., 1996;  
120 Goodbody and Wolpert, 1998; Mattar and Ostry, 2007) deviates from the  
121 training condition. The Gaussian-like angular generalization observed in these  
122 studies has also be found for lead-in movements, with different lead-in  
123 modalities exhibiting different characteristics, both in terms of their absolute  
124 level of influence, but also in their sharpness of tuning. In particular both  
125 active (Sarwary et al., 2015) and passive lead-in movements (Howard and  
126 Franklin, 2015) show narrower and deeper tuning than visual lead-in  
127 movements (Howard and Franklin, 2016).

128  
129 Interference studies have been widely adopted to investigate contextual  
130 effects on motor learning, and to examine if contextual cues can assist in the  
131 learning of opposing dynamics (Brashers-Krug et al., 1996; Gandolfo et al.,  
132 1996; Krakauer et al., 1999; Karniel and Mussa-Ivaldi, 2002; Caithness et al.,  
133 2004; Nozaki et al., 2006; Howard et al., 2013). Such interference paradigms  
134 are more sensitive to generalization effects of contextual cues than single field  
135 paradigms, and have been used effectively to examining the angular  
136 generalization characteristics of lead-in movements (Howard and Franklin,  
137 2015; 2016). Using these paradigms it has been possible to extract features  
138 of the neural basis functions underlying dynamical adaptation, allowing for the  
139 development of simple computational models (Howard et al., 2017). However,  
140 we still lack basic information on the generalization features of lead-in  
141 movements for different kinematics such as duration or distance.

142

143 Here, we first characterize the generalization of passive and visual lead-in  
144 movements across different kinematics using an interference paradigm. In two  
145 separate experiments, we examine generalization across distance and  
146 duration (and the dependent variable of speed) of passive and visual lead-in  
147 movements. Second, in order to gain insight into any commonality between  
148 the neural resources employed in passive and visual lead-in movements, we  
149 also investigate how adaptation transfers between these two different lead-in  
150 modalities.

151  
152

## 153 **Methods**

154

### 155 **Experimental Design**

156

157 *Subjects.* Sixteen human participants were randomly allocated to two  
158 experimental groups that each performed one experiment. Eight participants  
159 (7 female, aged  $24.8 \pm 5.0$  years, mean  $\pm$  sd) performed the passive lead-in  
160 experiment. Eight further participants (6 female; aged  $27.4 \pm 6.7$  years)  
161 participated in the visual lead-in experiment. All participants were right handed  
162 according to the Edinburgh handedness questionnaire (Oldfield, 1971), and  
163 naïve to the aims of the study. All participants provided written informed  
164 consent to the protocol before participating in the experiment, which had been  
165 approved by the University of Cambridge Ethics Committee. The methods  
166 were carried out in accordance with the approved guidelines.

167

168 *Apparatus.* Experiments were performed using a vBOT planar robotic  
169 manipulandum and its associated virtual reality system (Howard et al., 2009).  
170 Handle position is measured using optical encoders sampled at 1000 Hz, and  
171 motors operating under torque control allow the application of end-point  
172 forces. A force transducer (Nano 25; ATI), mounted under the handle,  
173 measures the applied forces, and its output signals were low-pass filtered at  
174 500 Hz using analogue 4<sup>th</sup> pole Bessel filters prior to digitization. To reduce  
175 body movement participants were seated in a sturdy chair in front of the  
176 apparatus and firmly strapped against the backrest with a four-point seatbelt.  
177 During an experiment, participants grasped the robot handle in their right  
178 hand while their right forearm was supported by an air sled, constraining arm  
179 movement to the horizontal plane. Participants could not view their hand  
180 directly. Instead veridical visual feedback was used to overlay images of the  
181 starting location, via point, final target, (all 1.25 cm radius disks) and a hand  
182 cursor (0.5 cm radius red disk) using the virtual reality system. This ensured  
183 that the visual cursor appeared to the participant in the same plane and at the  
184 same location as their hand. Data was collected at 1000 Hz and logged to  
185 disk for offline analysis using Matlab (Matlab, The MathWorks Inc., Natick,  
186 MA, USA).

187

188 *Force Fields.* In the adaptation movement, participants performed reaching  
189 movements either in a null field condition, a velocity-dependent curl force field  
190 (Gandolfo et al., 1996), or a mechanical channel (Scheidt et al., 2000). The  
191 curl force field was implemented as:

192

193

$$\begin{bmatrix} F_x \\ F_y \end{bmatrix} = k \begin{bmatrix} 0 & -1 \\ 1 & 0 \end{bmatrix} \begin{bmatrix} \dot{x} \\ \dot{y} \end{bmatrix} \quad (1)$$

194

195 where the field constant  $k$  was set to a value of  $\pm 16 \text{ Nm}^{-1}\text{s}$ , and the sign  
 196 determines the direction (CW or CCW) of the force-field. Each participant  
 197 experienced both force field directions. The direction of the force field was  
 198 always associated with a specific direction of a prior contextual movement.  
 199 The relationship between the contextual movement direction and curl field  
 200 direction (CW/CCW) was counterbalanced across participants.

201

| Condition                    | Duration [ms] | Distance [cm] |
|------------------------------|---------------|---------------|
| Passive training             | 700           | 10            |
| Visual training              | 700           | 10            |
|                              |               |               |
| Passive/Visual test channel  | 700           | 10            |
|                              |               |               |
| Passive/Visual probe channel | 1400          | 20            |
| Passive/Visual probe channel | 1050          | 15            |
| Passive/Visual probe channel | 420           | 6             |
| Passive/Visual probe channel | 210           | 3             |
| Passive/Visual probe channel | 1400          | 10            |
| Passive/Visual probe channel | 1050          | 10            |
| Passive/Visual probe channel | 420           | 10            |
| Passive/Visual probe channel | 350           | 10            |
| Passive/Visual probe channel | 700           | 20            |
| Passive/Visual probe channel | 700           | 15            |
| Passive/Visual probe channel | 700           | 6             |
| Passive/Visual probe channel | 700           | 3             |
| Passive/Visual probe channel | 1050          | 20            |
| Passive/Visual probe channel | 350           | 3             |

202

203

*Table 1. Generalization conditions*

204

205 Mechanical channel trials were implemented using a spring constant of  $6,000$   
 206  $\text{Nm}^{-1}$  and a damping constant of  $30 \text{ Nm}^{-1}\text{s}$  perpendicular to the direction of  
 207 motion throughout the movement between the central location and the final  
 208 target. Channel trials were only produced on the movements to the  $0^\circ$  target  
 209 with corresponding lead-in movements starting at  $135^\circ$  or  $225^\circ$ .

210

### 211 **Protocol**

212

213 Two separate experiments were performed to examine the generalization of  
 214 the learning associated with one contextual movement to other contextual  
 215 movements with different kinematic profiles (within the same modality), as  
 216 well as the transfer of learning between passive and visual lead-in conditions  
 217 (across the modalities).

218

219 After an initial pre-learning session in a null field, participants were exposed to  
220 the curl force fields (learning phase). Channel trials were used to examine  
221 adaptation to the novel dynamics, in which the lead-in movement duration,  
222 speed and distance were varied. In addition, the modality of the lead-in  
223 movement was occasionally changed to examine transfer. The trial  
224 parameters for both experiments are shown in Table 1 and the kinematics of  
225 the lead-in movements can be seen in Fig 1. On these trials, the lead-in  
226 movement was chosen from one of 15 different movements with distances  
227 ranging from 3 cm to 20 cm and durations ranging between 210 ms to 1400  
228 ms.  
229  
230

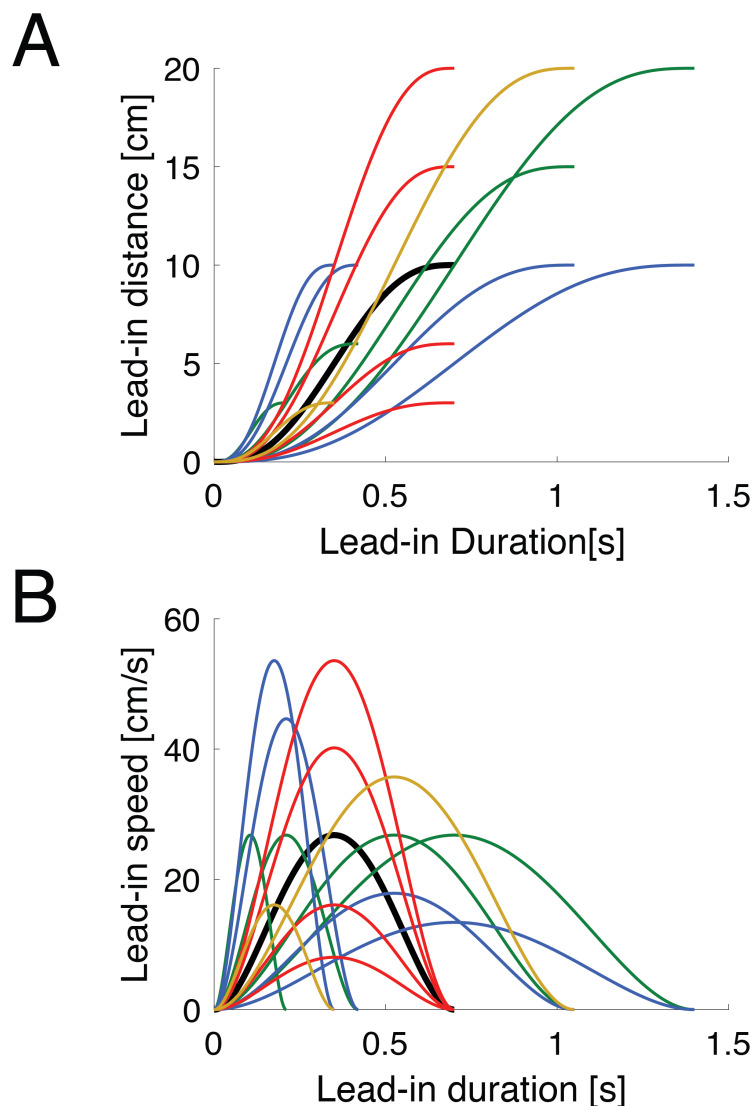

231  
232  
233 Figure 1. Kinematics of lead-in movements used for testing generalization. **A**  
234 Profiles of movement distance versus duration of lead-in probe conditions  
235 across all conditions. Thick black line indicates the training lead-in motion.  
236 Colors indicate specific conditions that are matched across duration (red),  
237 peak speed (green), or duration (blue). **B** Lead-in movement kinematics of  
238 peak speed as a function of duration.  
239

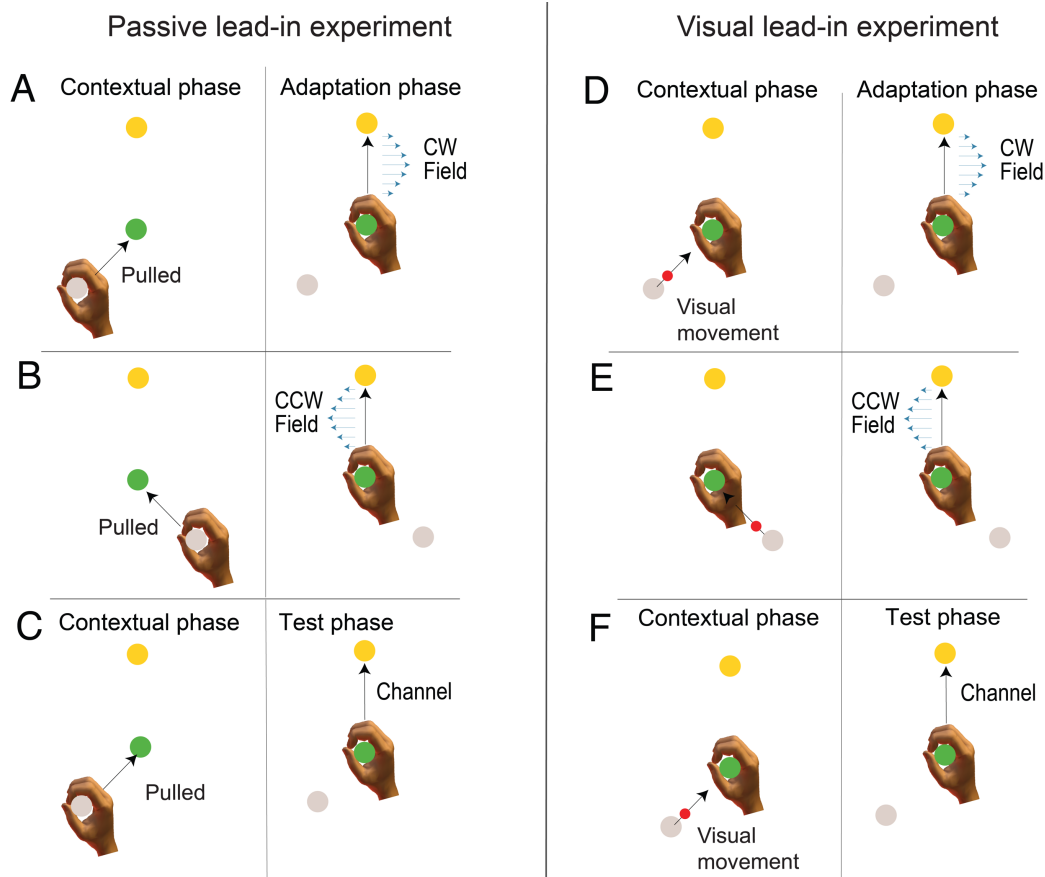

240  
241

242 **Figure 2. Experimental Design. A-C:** Passive lead-in generalization  
243 experiment. **A** Participants first experienced an initial passive lead-in motion  
244 from a starting position (grey circle) to the central target (green circle) and  
245 then immediately made a second active movement to the target (yellow circle)  
246 on which a curl force field (blue arrows) could be applied. **B** An initial  
247 movement from a different starting target was associated with the opposite  
248 force field on the second movement. The direction of curl force field and lead-  
249 in movements were counterbalanced across participants. **C** In order to  
250 examine learning rate and generalization, random trials in which the  
251 contextual movement was followed by a mechanical channel on the second  
252 movement to the target were applied. **D-F:** Visual lead-in generalization  
253 experiment. **D** Participants initially observed an initial visual cursor movement  
254 (red circle) from the grey starting circle to the central target (green circle).  
255 Once the cursor entered the central target, participants immediately  
256 performed a second active movement to the target (yellow circle) on which a  
257 curl force field (blue arrows) could be applied. **E** An initial cursor movement  
258 from a different starting target was associated with the opposite force field on  
259 the second movement. **F** On random trials, after the visual lead-in motion, a  
260 mechanical channel was applied on the active movement to the target to  
261 measure predictive compensation.

262

263 *Experiment 1. Passive lead-in movements.*

264

265 All trials consisted of a two-part movement: an initial lead-in movement  
266 followed directly by an adaptation movement (Fig 2A-C). The first part was a

267 contextual lead-in movement from a starting location to a central via point.  
268 This contextual lead-in movement was normally 10 cm in length during all null  
269 and force field training conditions. The second part was an 18cm adaptation  
270 movement to the final target. Only during the adaptation part of the movement  
271 could participants experience a force field (or channel trial). The lead-in  
272 movement direction (+45° or -45° relative to final target direction) was  
273 indicative of the direction of the curl force field on the adaptation movement  
274 (clockwise or counterclockwise). The adaptive part of the movement was  
275 made to one of two final targets, located at 0° and 270° degrees relative to the  
276 via point. The preceding contextual movements started from one of 3  
277 locations, namely at 135° or 225° and 45° or 135° degrees respectively, and  
278 end at a central via-point. Together this produced four possible two-part  
279 movements (combinations of lead-in and adaptation movement).

280  
281 In experiment 1, the contextual lead-in movement was comprised of a passive  
282 movement of the participant's hand. This passive movement was produced by  
283 the robotic manipulandum passively moving the participant's hand while no  
284 cursor was presented. Each trial began by displaying the start location for the  
285 lead-in movement, the central location and final target. The vBOT then moved  
286 the participant's hand to the lead-in start location. Once the handle was  
287 stationary within the start location for 300 ms, a beep was generated  
288 indicating the start of the trial. At this time, the handle of the robotic system  
289 moved to the central via-point following a minimum jerk trajectory. The training  
290 contextual movement was a 10cm movement of duration 700 ms. Once the  
291 hand reached the central location, participants were required to produce an  
292 active adaptation movement from the central location to the final target  
293 location. The dwell time of the hand within the central via point was required  
294 to between 0-250 ms, otherwise a warning was provided. If dwell time  
295 exceeded 500ms then the trial was aborted and repeated. If the second  
296 movement (adaptation movement) duration was between 450 ms and 600 ms  
297 a "Great" message was displayed; otherwise an appropriate "Too Fast" or  
298 "Too Slow" warning was shown. Force fields and channel trials were only ever  
299 presented during this second movement.

300 As many trials were required, each experiment was performed in two separate  
301 sessions on different days. There were 1546 and 1580 trials on days 1 and 2  
302 respectively, providing a total of 3126 trials. Participants were required to take  
303 short rest breaks approximately every 200 trials (195-205 trials) but could rest  
304 at any time between trials. The trials were organized as follows:

305

306 Day 1

307

308 Pre-exposure: The pre-exposure phase started with 2 blocks of 40 trials. A  
309 block consisted of 36 Null trials and 4 channel trials (Total 80 trials: 72 null  
310 trials, 8 training condition channel trials). Next, participants were provided with  
311 three repetitions of each of the 34 generalization channel trials (Total 102  
312 generalization condition channel trials) to ensure they had prior experience of  
313 the generalization trial conditions. Finally, 2 blocks of null field trials (36 null  
314 trials and 4 channel trial) were performed.

315



316 Exposure Training: During the exposure phase, the participants were exposed  
317 to the curl force fields during the adaptation movement. This phase consisted  
318 of 12 blocks of 40 trials (Total 480 trials: 432 field trials, 48 training condition  
319 channel trials).

320

321 Generalization Testing: This examined generalization of the learned predictive  
322 compensation by pseudo-randomly interspersing trials with curl field exposure  
323 with trials in which channel trials were preceded by the full range of contextual  
324 movements (different durations and distances). This consisted of 6 blocks of  
325 134 trials, which meant that there were 6 repetitions of each of the 34  
326 generalization channel trials. (Total 804 trials: 600 field trials, 204  
327 generalization condition channel trials). Generalization conditions are  
328 graphically illustrated in Fig. 1.

329

330 Day 2

331

332 Exposure Training: In the second session, training was briefly resumed. The  
333 phase consisted of 6 blocks of 40 trial blocks (Total 240 trials: 216 field trials,  
334 24 training condition channel trials).

335

336 Generalization Testing: Similar to the session of Day 1, participants performed  
337 10 blocks of 134 trials, providing 10 repetitions of each of the 34  
338 generalization channel trials. (Total 1340 trials: 1000 field trials, 340  
339 generalization condition channel trials).

340

341 Generalization lead-in conditions, which were always followed by a channel  
342 trial on the adaptation movement, were chosen to sample lead-in distances  
343 between 3 - 20 cm, peak speeds between 8.04 - 53.57  $\text{cms}^{-1}$  and durations  
344 between 210 - 1400 ms. In addition, a transfer condition was included in  
345 which the lead-in motion was occasionally substituted by a visual moving  
346 cursor and a reversed direction visual cursor.

347

348 *Experiment 2. Visual lead-in movements.*

349

350 Experiment 2 was had a similar design to Experiment 1, except that the  
351 contextual lead-in movements for both training and testing consisted of a  
352 visual movement of the cursor (Fig 2D-F). The training contextual lead-in  
353 movement again followed a minimum jerk trajectory of duration 700 ms from  
354 the start to the central location. During this time, the participant's hand  
355 remained stationary at the central location. Immediately after the cursor  
356 reached the central location, the participant made an active reaching  
357 adaptation movement from the central location to the final target. The same  
358 variations of generalization movement trials were performed (but with visual  
359 instead of passive motion). In addition, a transfer condition was used in which  
360 a passive movement lead-in was performed. Again, a reversed visual cursor  
361 condition was also employed.

362

363

364 **Data Analysis**

365

366 The experimental data was analyzed offline using Matlab R14. Statistics to  
367 examine differences between the generalization from visual lead-in and  
368 passive lead-in movements were performed in JASP 0.9.2 (JASP Team,  
369 2018) using both the ANOVA and Bayesian ANOVA. To examine learning,  
370 kinematic error on the adaptation movements and force compensation on the  
371 channel trials were used.

372  
373 *Kinematic error.* For each null and curl field trial, the kinematic error was  
374 calculated on the adaptation portion of the movement. This was quantified as  
375 the maximum perpendicular error (MPE), which is the maximum deviation of  
376 the hand path to the straight line joining the movement starting location to the  
377 target. For each participant, the average MPE over 8 trials was calculated.  
378 The sign of the MPE was flipped appropriately so that results from CW and  
379 CCW field trials could be appropriately combined together in this calculation.  
380 The mean and standard error (SE) of MPE was then computed across all  
381 participants.

382  
383 *Force compensation.* On each channel trial, force exerted by participants  
384 perpendicularly into the wall of the simulated channel was measured to  
385 estimate predictive feedforward adaptation. This method is preferable to  
386 relying on a reduction in kinematic error during force field learning, which can  
387 also arise from muscle co-contraction (Burdet et al., 2001; Franklin et al.,  
388 2003; Milner and Franklin, 2005). The measured channel force was regressed  
389 with the velocity of movement along the channel during the same period and  
390 then scaled by the field strength. This yielded an estimate of the level of force  
391 compensation present on the given channel trial (Smith et al., 2006). For  
392 plotting purposes, the force compensation data was averaged across 2  
393 channel trials for each participant. The mean and standard error (SE) of  
394 compensation was then computed across all participants to examine the  
395 generalization functions.

396  
397

## 398 **Results**

399

400 In the passive lead-in experiment, participants performed active reaching  
401 movements to a target after being passively moved from a start position to a  
402 central target. After initial movements in a null field, participants were  
403 presented with a curl force field during the active movement. The direction of  
404 the curl field depended on the angle between the passive movement and  
405 active movement (Fig 2A,B). When presented with the curl force field,  
406 participants' adaptation movements were disturbed, producing large errors  
407 that were gradually reduced over the exposure phase (Fig 3A). Throughout  
408 the experiment channel trials were introduced on random trials in order to  
409 measure the predictive force compensation throughout adaptation (Fig 2C).  
410 Over a similar timescale as the reduction in kinematic error, force  
411 compensation increased, reaching just over 63% compensation averaged  
412 over both force fields (Fig 3B). A small decay in the force compensation and  
413 increase in the kinematic error can be seen between day 1 and the start of  
414 day 2.

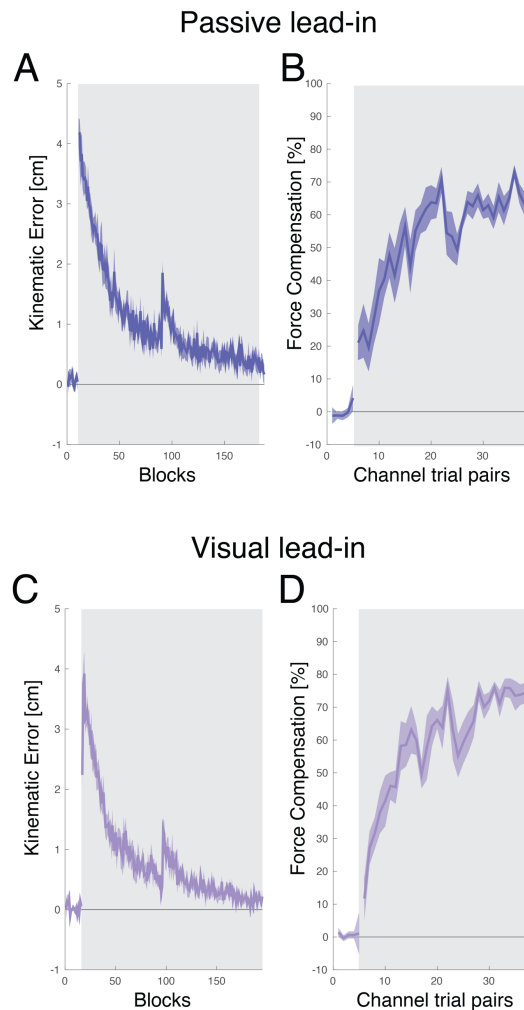

415  
416

417 Figure 3. Adaptation to two opposing force fields. **A** Mean and SE of MPE  
418 across over 8 participants for the passive lead-in experiment as a function of  
419 blocks of 8 trials. **B** Mean and SE of percentage force compensation for pairs  
420 of channel trials (one for each force field direction) throughout the passive  
421 lead-in experiment where the lead-in movement was the same as the training  
422 trials. **C** Mean and SE of MPE for the visual lead-in experiment. **E** Mean and  
423 SE of percentage force compensation for the visual lead-in experiment.

424

425 Participants in the visual lead-in experiment performed a similar protocol but  
426 where the lead-in movements were purely visual in nature (Fig 2D-F). Again,  
427 when presented with the curl force field, participants' adaptation movements  
428 were disturbed, producing large errors that were gradually reduced over the  
429 exposure phase (Fig 3C). Over a similar timescale, force compensation  
430 increased, reaching approximately 70% compensation averaged over both  
431 force fields (Fig 3D).

432

433 On random trials late in the adaptation phase, channel trials were applied with  
434 a range of different lead-in movement kinematics (Fig 1) in order to examine  
435 generalization. After learning the force fields with the passive lead-in  
436 movement, variations in the kinematics of this lead-in movement produced a  
437 range of generalization levels (Fig 4A). As the testing lead-in movements

438 varied further away from the training kinematics the predictive force level  
439 decreased. A similar finding is shown for the generalization after learning a  
440 visual lead-in movement (Fig 4B). However, in this condition only small  
441 decreases in the predictive force is seen over a wide range of changes in the  
442 lead-in kinematics.  
443

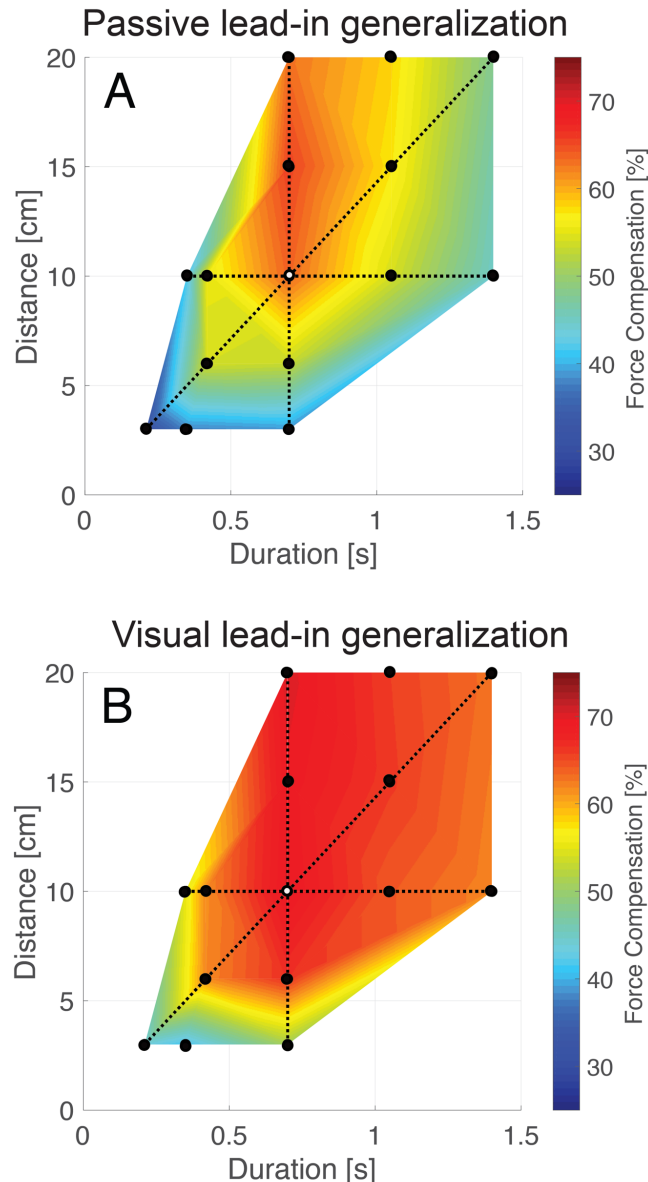

444  
445  
446 Figure 4. Generalization surface plots for passive and visual lead-in  
447 movements. **A** Surface plot of generalization for passive lead-in movements.  
448 The percentage force compensation is represented by color and plotted  
449 against lead-in duration and lead-in distance. The black circle with a white  
450 center indicates the result at the training condition. The solid black dots  
451 indicate points for which measurements were made on probe trials. The black  
452 dotted lines correspond to conditions with the same training lead-in distance  
453 of 10cm, same training lead-in duration of 0.7s or same training lead-in speed  
454 of 26.7cm/s. The legend shows the correspondence between color and  
455 percentage perfect force compensation. **B** Surface plot of generalization for  
456 the visual lead-in condition.

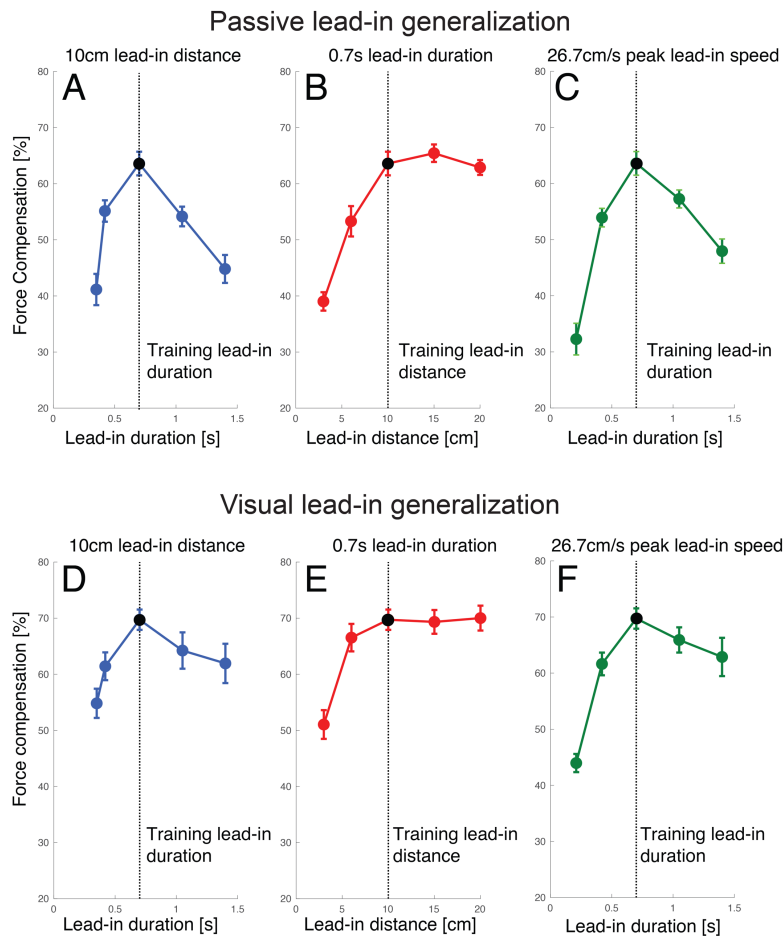

457  
458

459 Figure 5. Generalizations results for both passive and visual lead-in conditions  
460 plotted for fixed values of lead-in distance, lead-in duration and lead-in speed.  
461 **A-C** Results of passive lead-in experiments. The dotted lines indicate the  
462 training values of lead-in distance and lead-in duration. Error bars indicate  
463 standard error of the mean. **A** Effect of changing lead-in duration for fixed  
464 10cm lead-in distance. In this panel, lead-in distance is held constant and the  
465 movement duration (shown on the x-axis) and speed vary. **B** Effect of  
466 changing lead-in distance (and peak speed) across conditions with a fixed  
467 700ms lead-in duration. **C** Effect of changing lead-in duration (and distance)  
468 across conditions with a fixed 26.7cm/s lead-in speed. **D-F** Corresponding  
469 results for visual lead-in condition.

470

471 Across the different lead-in movement kinematics, several conditions had the  
472 same duration, peak velocity or distance as the learned training condition  
473 (dotted lines in Fig 4). Here we examine the predictive force compensation  
474 values over these conditions in more detail (Fig 5). The results for the passive  
475 lead-in condition show strong variations over changes in all three parameters  
476 (Fig 5A-C). In panel A, lead-in distance is held constant and the movement  
477 duration (shown on the x-axis) and speed vary. In panel B, lead-in duration is  
478 held constant and the movement distance (shown on the x-axis) and speed  
479 vary. In panel C, lead-in speed is held constant and the movement duration  
480 (shown on the x-axis) and the distance vary. The dotted lines indicate the  
481 training values of lead-in distance and lead-in duration. It can be seen that the  
482 recall of predictive compensation was strongly affected by changes in the

483 duration of the movement (shown for constant distance conditions in Fig 5A  
484 and constant speed conditions on Fig 5C). There was a strong tuning effect  
485 centered around the movement duration used for training, with compensation  
486 falling off as movement duration either increased or decreased from that  
487 value. However, changing lead-in distance produced different effects. While  
488 reducing lead-in distance again reduced compensation, increasing movement  
489 distance from the training value had little effect (Fig 5B).

490

491 In the visual lead-in condition, we found slightly less pronounced decay as the  
492 some of the kinematics were varied while others remained constant (Fig 5 D-  
493 F). Again, it can be seen that compensation was affected by changes in the  
494 duration of the movement. Although there was a tuning effect centered around  
495 the movement duration using for training, the fall off as duration deviated from  
496 the training value was less than in the passive lead-in condition (Fig 5D). As  
497 the training distance varied but duration was fixed, we saw the least decay,  
498 especially for longer distances (Fig 5E). Finally, as the peak speed was fixed,  
499 we found small decay the other variables were changed. (Fig 5F).

500

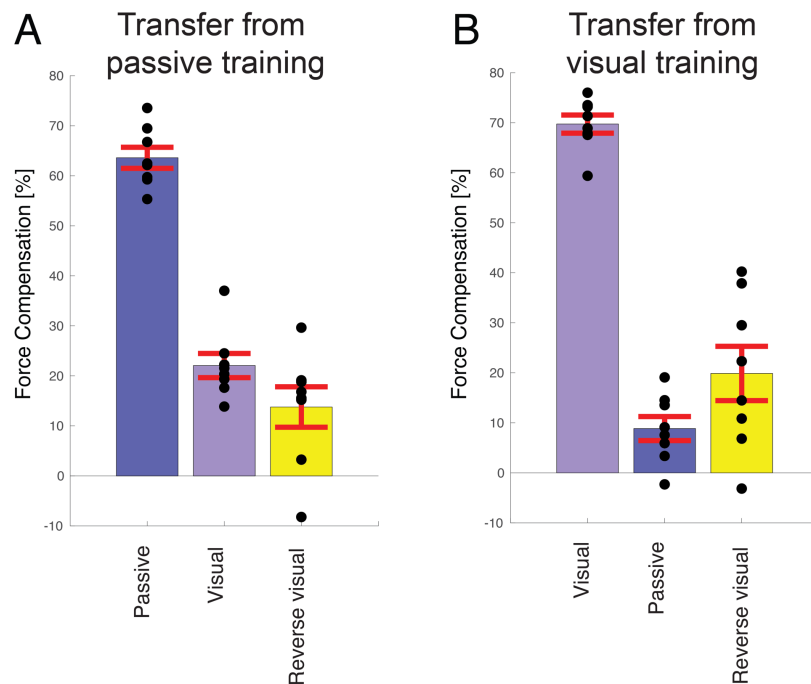

501

502

503 Figure 6. Comparison of transfer across sensory modality or to reversed  
504 visual cursor. **A** Transfer from passive lead-in to visual lead-in or reversed  
505 visual lead-in. For comparison the learned force compensation on passive  
506 movements is shown. Black circles indicate the results of individual  
507 participants. Error bars indicate standard error of the mean. **B** Transfer from  
508 visual lead-in to passive lead-in or reversed visual lead-in.

509

510 If we compare the generalization of the predictive compensation across the  
511 two experiments, we can see one major finding; namely that the overall tuning  
512 effects were much more pronounced for the passive lead-in condition  
513 compared to the visual lead-in condition. Visual lead-in generalization showed  
514 much less sensitivity to variations in lead-in kinematics. Indeed, whereas  
515 passive lead-ins resulted in a 2D monotonic curved surface in the dimensions

516 of duration and distance (Fig. 4A), the corresponding surface for visual lead-  
517 ins (Fig. 4B) exhibits a large region consisting of a flat planar surface. To test  
518 if this difference in the generalization across kinematics between passive and  
519 visual lead-in movements is statistically significant, we performed ANOVAs on  
520 the force compensation results (with main effects of kinematic condition (14  
521 levels) and lead-in modality (2 levels: visual or passive)). To do so, the force  
522 compensation for each testing condition was normalized with respect to the  
523 value at the trained condition for each participant. We found strong  
524 differences between the generalization results of the visual and passive lead-  
525 in movements (lead-in modality) using both frequentist ( $F_{1,196}=32.477$ ;  
526  $p<0.001$ ) and Bayesian ( $BF=13.664$ ) ANOVAs. This highlights a clear  
527 difference between visual inputs and passive inputs as a contextual signal for  
528 motor adaptation, extending our previous findings (Howard and Franklin,  
529 2015; 2016).

530

531 We also investigated how learning opposing force fields with contextual cues  
532 in one sensory modality would transfer to the other sensory modality. To  
533 investigate this, occasional channel trials were used with a lead-in in the other  
534 modality. It can be seen that there is asymmetric transfer between passive  
535 lead-in and visual lead-in movements (Fig 6). Although there was partial  
536 transfer from passive to visual lead-in movements (Fig 6A) with values  
537 reaching just above 20%, there was much less transfer from visual to passive  
538 lead-in movements (Fig 6B) with values just under 10%. To compare the level  
539 of transfer between the two modalities, the transferred adaptation was scaled  
540 according to the final level of adaptation in each experiment. The transfer from  
541 passive to visual was significantly larger than the transfer from visual to  
542 passive ( $F_{1,14}=15.9$ ,  $p<0.001$ ;  $BF=23.2$ ). Thus, there is a clear asymmetry  
543 between the transfer of adaptation between these two sensory modalities.

544

545 Finally, we examined how learning the visual lead-in movement would transfer  
546 to a completely reversed visual cursor (with the same duration and distance).  
547 To balance conditions and the number of trials across experiments, this was  
548 also tested for the passive lead-in. As expected, there was little transfer from  
549 passive lead-in to reverse visual lead-ins, although this value was only about  
550 75% of the forward visual lead-in transfer. The transfer from the visual training  
551 to the reversed visual lead-in was also low (approximately 20%) showing that  
552 the predictive compensation is sensitive to the direction of the visual motion.  
553 The recall of compensation in the reversed cursor transfer conditions were  
554 quite variable, as indicated by the spread of data points (black dots) shown as  
555 the mean of each individual participant.

556

557

## 558 Discussion

559

560 We investigated the kinematic generalization characteristics of passive and  
561 visual lead-in movements using a force field interference paradigm.  
562 Participants first experienced a lead-in movement and then immediately made  
563 an active movement in a curl force field where the field direction was  
564 associated with the lead-in movement. Channel trials within the active  
565 movement examined how predictive compensation varied as lead-in

566 kinematics were varied. In the first experiment lead-in movements were  
567 passive, whereas in the second experiment they were visual. For both  
568 modalities, recall of predictive compensation decreased as the duration of the  
569 lead-in movements deviated from the training condition. Reducing lead-in  
570 distance also reduced compensation but increasing lead-in distance had little  
571 effect on the force generalization. Our results show that although passive and  
572 visual lead-in movements influence memory formation and recall in  
573 subsequent movement, passive motion exhibits narrower generalization  
574 characteristics, whereas visual motion is much less sensitive to kinematic  
575 change.

576  
577 These generalization results further characterize the neural tuning exhibited  
578 by lead-in movements, extending beyond the directional tuning seen  
579 previously. The observation that passive lead-ins were more sensitive to  
580 changes in kinematics than visual lead-ins is consistent with the prior  
581 observations examining angular generalization (Howard and Franklin, 2015;  
582 Sarwary et al., 2015; Howard and Franklin, 2016). Namely that active and  
583 passive tuning was more pronounced and narrower than the wider tuning  
584 seen in the visual condition. More recently it was shown that the tuning  
585 characteristics of different lead-in modalities could explain why angular  
586 variability of active lead-in movements affects the learning rate in two-part  
587 movement tasks, whereas no such effect exists for visual lead-in movements  
588 (Howard et al., 2017). Our current results suggest that variations in the speed  
589 or duration of lead-in movements could provide similar decrements in learning  
590 rate, whereas an increase in movement distance would not have much effect.  
591 This might have important implications for rehabilitation, suggesting learning  
592 and recovery would be faster for training routines with consistent lead-in  
593 kinematics. One caveat is that such routines might also produce less  
594 generalization across tasks, as the adaptation is more likely to be learned  
595 specifically for the trained lead-in movement.

596  
597 In both experiments, to examine transfer of adaptation across modality, a  
598 visual lead-in cursor motion occasionally replaced the passive lead-in, and  
599 vice versa. Interestingly, there was an asymmetric transfer between passive  
600 and visual lead-in movements, with partial transfer from passive lead-in  
601 movements to visual lead-in movements, but almost no transfer from visual to  
602 passive lead-in movements. Transfer could arise because passive lead-in  
603 movement partially engages neural mechanisms shared by the visual  
604 observation of movement, but not the converse. This result may be due to  
605 asymmetry in the connections between the neural substrates. Alternatively, it  
606 could arise because the visual feedback pathway has a lower gain due to the  
607 uncertainly introduced by the longer time delay associated with visual  
608 information (Crevecoeur et al., 2016). The current observation that passive  
609 lead-in are more strongly tuned in duration than visual lead-ins, as well as the  
610 former results that the absolute level of influence of passive lead-ins (Howard  
611 and Franklin, 2015) is higher than for visual lead-in (Howard and Franklin,  
612 2016) supports the latter hypothesis.

613  
614 The wide ranging results from studies examining contextual cues for learning  
615 opposing dynamics have demonstrated that not all sensory signals are able to



616 influence motor learning (Hwang et al., 2003a; 2003b; Wainscott, 2004;  
617 Cothros et al., 2009; Addou et al., 2011; Yokoi et al., 2011; Hirashima and  
618 Nozaki, 2012; Howard et al., 2013; Sarwary et al., 2015; Nozaki et al., 2016).  
619 For example, color has essentially no effect (Howard et al., 2013). In addition  
620 to the strong effects of prior movements, it has been shown that particularly  
621 effective contextual cues relate to state; for example limb state and physical  
622 locations (Hwang and Shadmehr, 2005; Yeo et al., 2015), or different visual  
623 locations of the cursor and targets (Hirashima and Nozaki, 2012). Indeed, a  
624 location cue could constitute a complete physical shift of the movement task,  
625 or just a shift of one of its two essential components; namely a change in the  
626 location of the visual feedback, or a change in the physical location of the task  
627 with identical visual feedback. Further experiments have shown that future  
628 state also effects motor learning in an analogous way (Howard et al., 2015),  
629 with this effect depending on movement planning rather than execution  
630 (Sheahan et al., 2016).

631  
632 On the face of it, it appears that there are multiple types of contextual cues  
633 that strongly influence motor memory formation. Here we propose that a  
634 factor they all have in common is that they are related to either past, current,  
635 or future state of the limb; or are signals used in the estimation of such limb  
636 states. That is, setting up the sensorimotor system in a different state before  
637 (or at the end of) a movement allows the formation and recall of different  
638 motor memories. This suggests that some contextual cues (such as visual  
639 lead-in movement or location in the visual workspace) are simply effective  
640 because the motor system makes use of these signals within a state  
641 estimation mechanism to determine the state of the arm. Such state  
642 estimation can only be made on the basis of sensory feedback and efference  
643 copy. This hypothesis would be consistent with the observation that visual or  
644 proprioceptive movements are as effective an active movement. It would also  
645 explain why a visual change of state can be as effective as a complete  
646 change in the physical state of the limb. Moreover, it can explain why  
647 vestibular inputs could also be used to learn opposing dynamics (Sarwary et  
648 al., 2015) but why color cues have much less effect on the adaptation system  
649 (Howard et al., 2013).

650  
651 In order to reach with our arm to a specific location, our sensorimotor control  
652 system needs to know the initial limb state, and then activate the appropriate  
653 muscles in a specific pattern to generate forces that bring the arm into the  
654 final state to meet the task requirements. To make this movement robust in  
655 the face of noise and disturbances, this process does not simply rely on  
656 feedforward control, but makes use of sensory feedback of our arm's state,  
657 enabling online correction in any task-relevant deviation from the goal of our  
658 movement. Arm state can be estimated through the combination of  
659 appropriate sensory feedback signals such as proprioception from the skin  
660 muscles and joints, visual information, and vestibular inputs. However due to  
661 neural signal transmission and processing delays, motor responses to  
662 proprioceptive and visual feedback only start producing force after delays of  
663 50 ms and 140 ms respectively. Such delays represent a challenge in the  
664 design of a feedback control systems, since using direct feedback from  
665 delayed signals can lead to instability.

666

667 To deal with delay, Smith proposed an architecture which involves using  
668 immediate feedback from the output of a forward model of the plant, (known  
669 as an observer), rather than from the plant output directly (Smith, 1959). Miall  
670 and Wolpert suggested that the Smith predictor architecture could account for  
671 delays in the human motor system (Miall et al., 1993; Miall and Wolpert,  
672 1996). This approach is also often use engineering applications, where an  
673 observer is used to estimate the state of the plant, which can then be used in  
674 feedback control. To make an observer robust to inaccuracies of the forward  
675 model and to deal with disturbances, there is normally a state correction  
676 pathway term based on actual output error calculated as the difference  
677 between the actual output and a delayed prediction of plant output. This  
678 results in the state prediction based on the efference copy of the motor  
679 command being combined with a correction term based on the delayed  
680 sensory feedback, something which has been shown to occur during the  
681 control of human movement (Wolpert et al., 1995).

682

683 Within such an observer-based controller framework, the observer performs  
684 state estimation for an active movement using efference copy, while  
685 improving the estimate using the delayed feedback signals. In the case of a  
686 purely visual observation or passive movement of the arm, the observer can  
687 still make a state estimate, but only based on the state corrections from  
688 feedback. From the premise that state is the key issue in formation of  
689 separate motor memory, such a framework would account for the observation  
690 that either active, passive or visual lead-in movements would influence state  
691 estimation.

692

693 To conclude, we have shown the current and previous observations of lead-in  
694 phenomena are consistent with the hypothesis that the human motor system  
695 operates as an observer-based controller mechanism, that makes use of a  
696 forward model to estimate state. In particular, our results support the proposal  
697 (Crevecoeur et al., 2016) that even though the variances of visual positional  
698 information is known to be lower than that obtained from proprioception, its  
699 longer temporal delay reduces its weighting in state estimation. As a  
700 consequence of this, visual information has less effect on the motor system  
701 than proprioceptive information, an effect that we have extended to the  
702 learning and generalization of opposing dynamics.

703

#### 704 **Author contributions**

705

706 ISH and DWF designed and implemented the study. SF performed data  
707 collection. ISH performed data analysis. ISH, SF and DWF wrote the  
708 manuscript.

709

#### 710 **Competing interest statement**

711

712 The authors declare that they have no financial, personal, or professional  
713 interests that could be construed to have influenced the paper.

714

#### 715 **Acknowledgements**

716

717 Financial support was provided by the Centre for Robotics and Neural  
718 Systems at Plymouth University and by the Bavarian State Ministry for  
719 Science, Research & the Arts.

720

721

## 722 **References**

723

724 Addou T, Krouchev N, Kalaska JF (2011) Colored context cues can facilitate  
725 the ability to learn and to switch between multiple dynamical force fields.  
726 *Journal of Neurophysiology* 106:163–183.

727 Brashers-Krug T, Shadmehr R, Bizzi E (1996) Consolidation in human motor  
728 memory. *Nature* 382:252–255.

729 Burdet E, Osu R, Franklin DW, Milner TE, Kawato M (2001) The central  
730 nervous system stabilizes unstable dynamics by learning optimal  
731 impedance. *Nature* 414:446–449.

732 Caithness G, Osu R, Bays P, Chase H, Klassen J, Kawato M, Wolpert DM,  
733 Flanagan JR (2004) Failure to consolidate the consolidation theory of  
734 learning for sensorimotor adaptation tasks. *Journal of Neuroscience*  
735 24:8662–8671.

736 Churchland MM, Cunningham JP, Kaufman MT, Foster JD, Nuyujukian P,  
737 Ryu SI, Shenoy KV (2012) Neural population dynamics during reaching.  
738 *Nature*:1–8.

739 Cothros N, Wong J, Gribble PL (2009) Visual cues signaling object grasp  
740 reduce interference in motor learning. *Journal of Neurophysiology*  
741 102:2112–2120.

742 Crevecoeur F, Munoz DP, Scott SH (2016) Dynamic Multisensory Integration:  
743 Somatosensory Speed Trumps Visual Accuracy during Feedback Control.  
744 *J Neurosci* 36:8598–8611.

745 Donchin O, Francis JT, Shadmehr R (2003) Quantifying generalization from  
746 trial-by-trial behavior of adaptive systems that learn with basis functions:  
747 theory and experiments in human motor control. *Journal of Neuroscience*  
748 23:9032–9045.

749 Franklin DW, Osu R, Burdet E, Kawato M, Milner TE (2003) Adaptation to  
750 stable and unstable dynamics achieved by combined impedance control  
751 and inverse dynamics model. *Journal of Neurophysiology* 90:3270–3282.

752 Gandolfo F, Mussa-Ivaldi FA, Bizzi E (1996) Motor learning by field  
753 approximation. *Proc Natl Acad Sci USA* 93:3843–3846.

754 Goodbody SJ, Wolpert DM (1998) Temporal and amplitude generalization in  
755 motor learning. *Journal of Neurophysiology* 79:1825–1838.

- 756 Hirashima M, Nozaki D (2012) Distinct motor plans form and retrieve distinct  
757 motor memories for physically identical movements. *Curr Biol* 22:432–  
758 436.
- 759 Howard IS, Ford C, Cangelosi A, Franklin DW (2017) Active lead-in variability  
760 affects motor memory formation and slows motor learning. *Scientific*  
761 *Reports* 7:7806.
- 762 Howard IS, Franklin DW (2015) Neural Tuning Functions Underlie Both  
763 Generalization and Interference. Gribble PL, ed. *PLoS ONE* 10:e0131268.
- 764 Howard IS, Franklin DW (2016) Adaptive tuning functions arise from visual  
765 observation of past movement. *Scientific Reports* 6:28416.
- 766 Howard IS, Ingram JN, Franklin DW, Wolpert DM (2012) Gone in 0.6  
767 seconds: the encoding of motor memories depends on recent  
768 sensorimotor States. *Journal of Neuroscience* 32:12756–12768.
- 769 Howard IS, Ingram JN, Wolpert DM (2009) A modular planar robotic  
770 manipulandum with end-point torque control. *Journal of Neuroscience*  
771 *Methods* 181:199–211.
- 772 Howard IS, Wolpert DM, Franklin DW (2013) The effect of contextual cues on  
773 the encoding of motor memories. *Journal of Neurophysiology* 109:2632–  
774 2644.
- 775 Howard IS, Wolpert DM, Franklin DW (2015) The value of the follow-through  
776 derives from motor learning depending on future actions. *Curr Biol*  
777 25:397–401.
- 778 Hwang EJ, Donchin O, Smith MA, Shadmehr R (2003a) A gain-field encoding  
779 of limb position and velocity in the internal model of arm dynamics. *Plos*  
780 *Biol* 1:E25.
- 781 Hwang EJ, Donchin O, Smith MA, Shadmehr R (2003b) A Gain-Field  
782 Encoding of Limb Position and Velocity in the Internal Model of Arm  
783 Dynamics. *Plos Biol* 1:e25.
- 784 Hwang EJ, Shadmehr R (2005) Internal models of limb dynamics and the  
785 encoding of limb state. *J Neural Eng* 2:S266–S278.
- 786 Karniel A, Mussa-Ivaldi FA (2002) Does the motor control system use multiple  
787 models and context switching to cope with a variable environment? *Exp*  
788 *Brain Res* 143:520–524.
- 789 Krakauer JW, Ghilardi MF, Ghez C (1999) Independent learning of internal  
790 models for kinematic and dynamic control of reaching. *Nat Neurosci*  
791 2:1026–1031.
- 792 Mattar AAG, Ostry DJ (2007) Modifiability of Generalization in Dynamics  
793 Learning. *Journal of Neurophysiology* 98:3321–3329.

- 794 Miall RC, Weir DJ, Wolpert DM, Stein JF (1993) Is the cerebellum a smith  
795 predictor? *J Mot Behav* 25:203–216.
- 796 Miall RC, Wolpert DM (1996) Forward Models for Physiological Motor Control.  
797 *Neural Netw* 9:1265–1279.
- 798 Milner TE, Franklin DW (2005) Impedance control and internal model use  
799 during the initial stage of adaptation to novel dynamics in humans. *The*  
800 *Journal of Physiology* 567:651–664.
- 801 Nozaki D, Kurtzer I, Scott SH (2006) Limited transfer of learning between  
802 unimanual and bimanual skills within the same limb. *Nat Neurosci* 9:1364–  
803 1366.
- 804 Nozaki D, Yokoi A, Kimura T, Hirashima M, Orban de Xivry J-J (2016)  
805 Tagging motor memories with transcranial direct current stimulation allows  
806 later artificially-controlled retrieval. *Elife* 5.
- 807 Oldfield RC (1971) The assessment and analysis of handedness: the  
808 Edinburgh inventory. *Neuropsychologia* 9:97–113.
- 809 Pandarinath C, Gilja V, Blabe CH, Nuyujukian P, Sarma AA, Sorice BL,  
810 Eskandar EN, Hochberg LR, Henderson JM, Shenoy KV (2015) Neural  
811 population dynamics in human motor cortex during movements in people  
812 with ALS. *Elife* 4:e07436.
- 813 Reinkensmeyer DJ, Burdet E, Casadio M, Krakauer JW, Kwakkel G, Lang  
814 CE, Swinnen SP, Ward NS, Schweighofer N (2016) Computational  
815 neurorehabilitation: modeling plasticity and learning to predict recovery. *J*  
816 *NeuroEngineering Rehabil* 13:42.
- 817 Sarwary AME, Stegeman DF, Selen LPJ, Medendorp WP (2015)  
818 Generalization and transfer of contextual cues in motor learning. *Journal*  
819 *of Neurophysiology*:jn.00217.2015.
- 820 Scheidt RA, Reinkensmeyer DJ, Conditt MA, Rymer WZ, Mussa-Ivaldi FA  
821 (2000) Persistence of motor adaptation during constrained, multi-joint, arm  
822 movements. *Journal of Neurophysiology* 84:853–862.
- 823 Sheahan HR, Franklin DW, Wolpert DM (2016) Motor Planning, Not  
824 Execution, Separates Motor Memories. *Neuron* 92:773–779.
- 825 Smith MA, Ghazizadeh A, Shadmehr R (2006) Interacting adaptive processes  
826 with different timescales underlie short-term motor learning. *Plos Biol*  
827 4:e179.
- 828 Smith OJM (1959) A controller to overcome dead time. *ISA J* 6:28–33.
- 829 Thoroughman KA, Shadmehr R (2000) Learning of action through adaptive  
830 combination of motor primitives. *Nature* 407:742–747.

- 831 Wainscott SK (2004) Internal Models and Contextual Cues: Encoding Serial  
832 Order and Direction of Movement. *Journal of Neurophysiology* 93:786–  
833 800.
- 834 Wolpert DM, Ghahramani Z, Jordan MI (1995) An internal model for  
835 sensorimotor integration. *Science* 269:1880–1882.
- 836 Yeo S-H, Wolpert DM, Franklin DW (2015) Coordinate Representations for  
837 Interference Reduction in Motor Learning. Balasubramaniam R, ed. *PLoS*  
838 *ONE* 10:e0129388.
- 839 Yokoi A, Hirashima M, Nozaki D (2011) Gain field encoding of the kinematics  
840 of both arms in the internal model enables flexible bimanual action.  
841 *Journal of Neuroscience* 31:17058–17068.
- 842
